# Supplementary material for: The Effect of Psyllium Husk on Intestinal Microbiota in Constipated Patients and Healthy Controls
Source: PubMed Central journal article supplement (PMC6358997; doi:10.3390/ijms20020433), 2019-01-20
Supplement: ijms-20-00433-s001.pdf [file ijms-20-00433-s001.pdf]

## The Effect of Psyllium Husk on Intestinal Microbiota in Constipated Patients and Healthy Controls

Jonna Jalanka <sup>1,2</sup>, Giles Major <sup>2</sup>, Kathryn Murray <sup>2</sup>, Gulzar Singh <sup>2</sup>, Adam Nowak <sup>3</sup>, Caroline Kurtz <sup>4</sup>, Inmaculada Silos-Santiago <sup>5</sup>, Jeffrey M. Johnston <sup>6</sup>, Willem M. de Vos <sup>7</sup> and Robin Spiller <sup>2,\*</sup>

**Table S1.** Differences in the amount of short-chain fatty acids (SCFAs) during the intervention in both healthy and constipated. Significant difference against the baseline level (t-test,  $p < .05$ ) indicated with an asterisk, standard deviation in brackets.

|                     |                | Acetate<br>( $\mu\text{M/g}$ wet faeces) | Propanoate<br>( $\mu\text{M/g}$ wet faeces) | Butyrate<br>( $\mu\text{M/g}$ wet faeces) |
|---------------------|----------------|------------------------------------------|---------------------------------------------|-------------------------------------------|
| Healthy<br>controls | Baseline       | 6.90 (3.72)                              | 5.49 (2.71)                                 | 5.88 (3.75)                               |
|                     | Psyllium 10.5g | 8.68 (2.80)                              | 7.16 (3.68)                                 | 6.17 (2.83)                               |
|                     | Psyllium 21g   | 8.86 (2.08)                              | 7.12 (3.98)                                 | 5.58 (1.49)                               |
|                     | Placebo        | 11.56 (6.23)                             | 8.42 (8.10)                                 | 8.36 (5.12)                               |
| Constipated         | Baseline       | 21.65 (3.64)                             | 4.70 (3.44)                                 | 5.32 (4.78)                               |
|                     | Psyllium 21g   | <b>24.03* (2.75)</b>                     | <b>7.26* (3.47)</b>                         | 6.87 (3.85)                               |
|                     | Maltodextrin   | 21.11 (3.44)                             | 5.25 (4.15)                                 | 6.03 (4.99)                               |
|                     | Wash-out       | 21.74 (4.53)                             | 5.09 (4.17)                                 | 5.54 (3.72)                               |

**Table S2.** Associations between the intestinal microbiota composition and whole gut transit time (Weighted Average Position Score after 24 h (WAPS-24) and 48 h (WAPS-48)), relative stool water content and SCFAs, introduced by psyllium consumption in constipated patients. Each cell contains information of the direction of the association (+/-) and the FDR corrected p-value for this association. If the cell is empty, no significant association was found.

| taxon                                                                                     | WAPS-48    | WAPS-24    | Water content | Propionate    | Butyrate | Acetate    |
|-------------------------------------------------------------------------------------------|------------|------------|---------------|---------------|----------|------------|
| Actinobacteria; Actinobacteria; Actinomycetales; Actinomycetaceae; Actinomyces            |            | +, q=0.08  | - , q=0.01    |               |          |            |
| Actinobacteria; Actinobacteria; Bifidobacteriales; Bifidobacteriaceae;<br>Bifidobacterium |            |            | - , q=0.03    |               |          |            |
| Actinobacteria; Coriobacteriia; Coriobacteriales; Coriobacteriaceae;<br>Asaccharobacter   |            |            | - , q=0.02    |               |          |            |
| Actinobacteria; Coriobacteriia; Coriobacteriales; Coriobacteriaceae; Eggerthella          |            | +, q=0.005 |               |               |          | - , q=0.05 |
| Actinobacteria; Coriobacteriia; Coriobacteriales; Coriobacteriaceae; Slackia              |            | - , q=0.05 |               |               |          |            |
| Actinobacteria; Coriobacteriia; Coriobacteriales; Coriobacteriaceae; uncultured           |            | +, q=0.09  | - , q=0.01    |               |          |            |
| Bacteroidetes; Bacteroidia; Bacteroidales; Porphyromonadaceae; Odoribacter                | - , q=0.02 | - , q=0.03 |               |               |          |            |
| Firmicutes; Clostridia; Clostridiales; Christensenellaceae; Christensenella               |            | +, q=0.05  | - , q=0.01    | - , q=0.07    |          | - , q=0.09 |
| Firmicutes; Clostridia; Clostridiales; Clostridiaceae; Clostridium                        |            |            |               | - , q=5.69E-5 |          | - , q=0.03 |
| Firmicutes; Clostridia; Clostridiales; Eubacteriaceae; Anaerofustis                       |            | +, q=0.08  |               |               |          |            |
| Firmicutes; Clostridia; Clostridiales; FamilyXIIIIncertaeSedis; IncertaeSedis             |            |            |               | - , q=0.07    |          | - , q=0.04 |
| Firmicutes; Clostridia; Clostridiales; FamilyXIIncertaeSedis; Anaerococcus                |            |            |               | - , q=0.02    |          |            |
| Firmicutes; Clostridia; Clostridiales; FamilyXIIncertaeSedis; Finegoldia                  |            |            |               | - , q=0.02    |          |            |
| Firmicutes; Clostridia; Clostridiales; Lachnospiraceae; Anaerostipes                      | +, q=0.02  |            |               |               |          |            |
| Firmicutes; Clostridia; Clostridiales; Lachnospiraceae; Lachnospira                       |            |            | +, q=0.03     |               |          | +, q=0.002 |
| Firmicutes; Clostridia; Clostridiales; Lachnospiraceae; Roseburia                         |            |            | +, q=0.03     | +, q=0.07     |          |            |
| Firmicutes; Clostridia; Clostridiales; Peptostreptococcaceae; IncertaeSedis               | +, q=0.07  |            |               |               |          |            |
| Firmicutes; Clostridia; Clostridiales; Ruminococcaceae; Faecalibacterium                  |            |            | +, q=0.0001   | +, q=0.07     |          | +, q=0.04  |
| Firmicutes; Negativicutes; Selenomonadales; Acidaminococcaceae;<br>Phascolarctobacterium  |            |            |               | +, q=0.005    |          | +, q=0.005 |
| Firmicutes; Negativicutes; Selenomonadales; Veillonellaceae; Veillonella                  |            |            |               |               |          | +, q=0.02  |
| Proteobacteria; Betaproteobacteria; Burkholderiales; Alcaligenaceae; Parasutterella       |            |            | +, q=0.03     |               |          |            |
| Proteobacteria; Betaproteobacteria; Burkholderiales; Alcaligenaceae; Sutterella           | - , q=0.02 | - , q=0.08 |               |               |          |            |

**Table S3.** Associations between the intestinal microbiota composition and whole gut transit time (WAPS-24), relative stool water content and SCFAs, introduced by psyllium consumption in healthy subjects. Each cell contains information of the direction of the association ( +/- ) and the FDR corrected p-value for this association. If the cell is empty, no significant association was found.

| taxon                                                                           | WAPS-24    | Propionate | Butyrate     | Acetate    | Water content |
|---------------------------------------------------------------------------------|------------|------------|--------------|------------|---------------|
| Bacteroidetes; Bacteroidia; Bacteroidales; Porphyromonadaceae; Parabacteroides  |            |            | - , q=0.04   |            |               |
| Firmicutes; Bacilli; Lactobacillales; Leuconostocaceae; Leuconostoc             |            |            | + , q=0.03   |            |               |
| Firmicutes; Clostridia; Clostridiales; FamilyXIIIIncertaeSedis; IncertaeSedis   |            |            |              | - , q=0.07 |               |
| Firmicutes; Clostridia; Clostridiales; FamilyXIIncertaeSedis; Anaerococcus      |            |            |              |            | - , q=0.05    |
| Firmicutes; Clostridia; Clostridiales; FamilyXIIncertaeSedis; Finegoldia        |            |            | - , q=0.04   |            |               |
| Firmicutes; Clostridia; Clostridiales; FamilyXIIncertaeSedis; Peptoniphilus     |            |            | - , q=0.09   |            |               |
| Firmicutes; Clostridia; Clostridiales; Lachnospiraceae; Blautia                 |            |            |              | + , q=0.07 |               |
| Firmicutes; Clostridia; Clostridiales; Lachnospiraceae; Butyrivibrio            |            | - , q=0.08 |              |            |               |
| Firmicutes; Clostridia; Clostridiales; Ruminococcaceae; Anaerotruncus           |            |            |              | - , q=0.07 |               |
| Firmicutes; Clostridia; Clostridiales; Ruminococcaceae; Flavonifractor          |            |            | - , q=0.0004 | - , q=0.02 |               |
| Proteobacteria; Betaproteobacteria; Burkholderiales; Alcaligenaceae; Sutterella | - , q=0.05 |            |              |            |               |
